# Supplementary material for: Effects of topographical guidance cues on osteoblast cell migration
Source: PubMed Central journal article supplement (PMC7672072; doi:10.1038/s41598-020-77103-0), 2020-11-17
Supplement: 41598_2020_77103_MOESM1_ESM.pdf [file 41598_2020_77103_MOESM1_ESM.pdf]

## **Effects of Topographical Guidance Cues on Osteoblast Cell Migration**

F. M. Refaaq, X. Chen, and S. W. Pang\*

Department of Electrical Engineering

Centre for Biosystems, Neuroscience, and Nanotechnology

City University of Hong Kong, Kowloon, Hong Kong, China

\*Corresponding Author:

S. W. Pang (pang@cityu.edu.hk)

Department of Electrical Engineering

City University of Hong Kong

Kowloon, Hong Kong, China

Phone: +852 3442 9853

Fax: +852 3442 0562

## Supplementary Materials

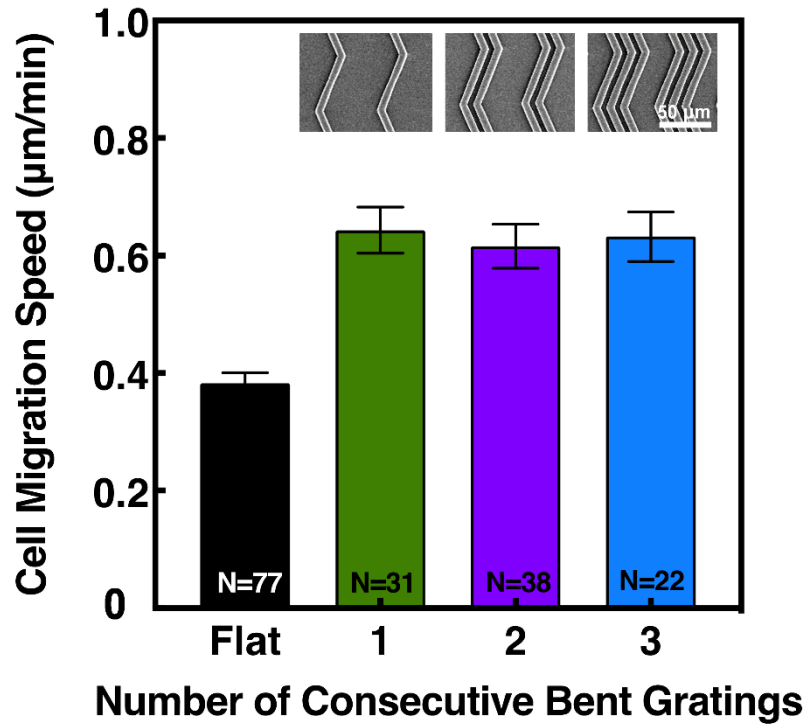

**Supplementary Fig. S1.** Speed of MC3T3-E1 cells on bent gratings with increasing bent density. Spacing between 1 consecutive bent grating is 42 µm; spacing between 2 consecutive bent gratings is 36 µm; and spacing between 3 consecutive bent gratings is 30 µm. One-way ANOVA and Tukey's post hoc test indicated no significant differences between bend density groups ( $p > 0.05$ ).
